# Supplementary material
Source: publisher figshare collection journal article supplement (https://acs.figshare.com/ndownloader/files/4060978)
Supplement: Supplementary file 1 [file 4060978]

## Sheet: Scifo et Suppl Table 1_Exp. 1
Supplementary Table 1: Unfiltered list of proteins isolated from SH-SY5Y-NTAP-CLN3 stable cells_Exp. 1
Saint Bait	Prey	PreyGeneID	PreyGeneName	Spec	Total Spec	Max Spec	Number Rep	Prob	iProb	ctrlCounts	Avg SAINT	Max SAINT
CLN3(1201)	IMMT_HUMAN	10989	IMMT	45	45	45	1	1.00	1.00	0	1.0000	1.0000
CLN3(1201)	ADT1_HUMAN	291	SLC25A4	74	74	74	1	1.00	1.00	0	1.0000	1.0000
CLN3(1201)	GCN1L_HUMAN	10985	GCN1L1	40	40	40	1	1.00	1.00	0	1.0000	1.0000
CLN3(1201)	RTL1_HUMAN	388015	RTL1	38	38	38	1	1.00	1.00	0	1.0000	1.0000
CLN3(1201)	CMC2_HUMAN	10165	SLC25A13	27	27	27	1	1.00	1.00	0	1.0000	1.0000
CLN3(1201)	PRKDC_HUMAN	5591	PRKDC	32	32	32	1	1.00	1.00	0	1.0000	1.0000
CLN3(1201)	TBA1B_HUMAN	10376	TUBA1B	74	74	74	1	1.00	1.00	0	1.0000	1.0000
CLN3(1201)	TBB2A_HUMAN	7280	TUBB2A	118	118	118	1	1.00	1.00	0	1.0000	1.0000
CLN3(1201)	ADT3_HUMAN	293	SLC25A6	82	82	82	1	1.00	1.00	0	1.0000	1.0000
CLN3(1201)	TBB2C_HUMAN	10383	TUBB4B	108	108	108	1	1.00	1.00	0	1.0000	1.0000
CLN3(1201)	TBB6_HUMAN	84617	TUBB6	37	37	37	1	1.00	1.00	0	1.0000	1.0000
CLN3(1201)	TBB2B_HUMAN	347733	TUBB2B	119	119	119	1	1.00	1.00	0	1.0000	1.0000
CLN3(1201)	AT2A2_HUMAN	488	ATP2A2	13	13	13	1	1.00	1.00	0	0.9980	0.9980
CLN3(1201)	SFXN3_HUMAN	81855	SFXN3	15	15	15	1	1.00	1.00	0	0.9960	0.9960
CLN3(1201)	XPO1_HUMAN	7514	XPO1	13	13	13	1	1.00	1.00	0	0.9960	0.9960
CLN3(1201)	HSP7C_HUMAN	3312	HSPA8	19	19	19	1	0.99	0.99	0	0.9940	0.9940
CLN3(1201)	CPT1A_HUMAN	1374	CPT1A	15	15	15	1	0.99	0.99	0	0.9940	0.9940
CLN3(1201)	LAC7_HUMAN	28834	IGLC7	10	10	10	1	0.99	0.99	0	0.9920	0.9920
CLN3(1201)	ADT2_HUMAN	292	SLC25A5	75	75	75	1	0.99	0.99	4	0.9900	0.9900
CLN3(1201)	HSPB1_HUMAN	3315	HSPB1	11	11	11	1	0.99	0.99	0	0.9900	0.9900
CLN3(1201)	SERA_HUMAN	26227	PHGDH	18	18	18	1	0.99	0.99	0	0.9880	0.9880
CLN3(1201)	AF1Q_HUMAN	10962	MLLT11	5	5	5	1	0.98	0.98	0	0.9820	0.9820
CLN3(1201)	DHB12_HUMAN	51144	HSD17B12	10	10	10	1	0.98	0.98	0	0.9800	0.9800
CLN3(1201)	TECR_HUMAN	9524	TECR	6	6	6	1	0.98	0.98	0	0.9760	0.9760
CLN3(1201)	DOPO_HUMAN	1621	DBH	8	8	8	1	0.97	0.97	0	0.9720	0.9720
CLN3(1201)	CC001_HUMAN	51300	TIMMDC1	7	7	7	1	0.97	0.97	0	0.9720	0.9720
CLN3(1201)	SFXN1_HUMAN	94081	SFXN1	10	10	10	1	0.97	0.97	0	0.9720	0.9720
CLN3(1201)	TBAL3_HUMAN	79861	TUBAL3	9	9	9	1	0.97	0.97	0	0.9700	0.9700
CLN3(1201)	KV305_HUMAN		KV305_HUMAN	5	5	5	1	0.97	0.97	0	0.9700	0.9700
CLN3(1201)	QCR2_HUMAN	7385	UQCRC2	6	6	6	1	0.97	0.97	0	0.9680	0.9680
CLN3(1201)	GRP78_HUMAN	3309	HSPA5	6	6	6	1	0.97	0.97	0	0.9680	0.9680
CLN3(1201)	CALU_HUMAN	813	CALU	5	5	5	1	0.97	0.97	0	0.9680	0.9680
CLN3(1201)	AUP1_HUMAN	550	AUP1	8	8	8	1	0.97	0.97	0	0.9680	0.9680
CLN3(1201)	RPN2_HUMAN	6185	RPN2	5	5	5	1	0.97	0.97	0	0.9660	0.9660
CLN3(1201)	HNRPF_HUMAN	3185	HNRNPF	6	6	6	1	0.96	0.96	0	0.9640	0.9640
CLN3(1201)	RS27L_HUMAN	51065	RPS27L	5	5	5	1	0.96	0.96	0	0.9640	0.9640
CLN3(1201)	DPM1_HUMAN	8813	DPM1	6	6	6	1	0.96	0.96	0	0.9640	0.9640
CLN3(1201)	FADS2_HUMAN	9415	FADS2	7	7	7	1	0.96	0.96	0	0.9580	0.9580
CLN3(1201)	ECM29_HUMAN	23392	KIAA0368	5	5	5	1	0.96	0.96	0	0.9560	0.9560
CLN3(1201)	TXTP_HUMAN	6576	SLC25A1	6	6	6	1	0.95	0.95	0	0.9500	0.9500
CLN3(1201)	GHC1_HUMAN	79751	SLC25A22	6	6	6	1	0.95	0.95	0	0.9500	0.9500
CLN3(1201)	DNJA1_HUMAN	3301	DNAJA1	6	6	6	1	0.95	0.95	0	0.9500	0.9500
CLN3(1201)	HNRH1_HUMAN	3187	HNRNPH1	6	6	6	1	0.95	0.95	0	0.9500	0.9500
CLN3(1201)	RCN2_HUMAN	5955	RCN2	5	5	5	1	0.95	0.95	0	0.9500	0.9500
CLN3(1201)	DIC_HUMAN	1468	SLC25A10	5	5	5	1	0.95	0.95	0	0.9480	0.9480
CLN3(1201)	LPHN2_HUMAN	23266	LPHN2	6	6	6	1	0.94	0.94	0	0.9440	0.9440
CLN3(1201)	ACTA_HUMAN	59	ACTA2	5	5	5	1	0.94	0.94	0	0.9440	0.9440
CLN3(1201)	FKBP8_HUMAN	23770	FKBP8	4	4	4	1	0.94	0.94	0	0.9440	0.9440
CLN3(1201)	HACD3_HUMAN	51495	PTPLAD1	4	4	4	1	0.94	0.94	0	0.9420	0.9420
CLN3(1201)	TIM50_HUMAN	92609	TIMM50	5	5	5	1	0.94	0.94	0	0.9400	0.9400
CLN3(1201)	DNJA2_HUMAN	10294	DNAJA2	4	4	4	1	0.94	0.94	0	0.9380	0.9380
CLN3(1201)	TMM33_HUMAN	55161	TMEM33	4	4	4	1	0.94	0.94	0	0.9360	0.9360
CLN3(1201)	CHCH3_HUMAN	54927	CHCHD3	3	3	3	1	0.93	0.93	0	0.9340	0.9340
CLN3(1201)	ERLN2_HUMAN	11160	ERLIN2	4	4	4	1	0.93	0.93	0	0.9340	0.9340
CLN3(1201)	AT1A1_HUMAN	476	ATP1A1	4	4	4	1	0.93	0.93	0	0.9320	0.9320
CLN3(1201)	RS27_HUMAN	6232	RPS27	5	5	5	1	0.93	0.93	0	0.9320	0.9320
CLN3(1201)	EF1A3_HUMAN	158078	EEF1A1P5	4	4	4	1	0.93	0.93	0	0.9300	0.9300
CLN3(1201)	EMD_HUMAN	2010	EMD	4	4	4	1	0.93	0.93	0	0.9260	0.9260
CLN3(1201)	TM165_HUMAN	55858	TMEM165	4	4	4	1	0.92	0.92	0	0.9240	0.9240
CLN3(1201)	RPN1_HUMAN	6184	RPN1	4	4	4	1	0.92	0.92	0	0.9220	0.9220
CLN3(1201)	SCAM3_HUMAN	10067	SCAMP3	4	4	4	1	0.92	0.92	0	0.9220	0.9220
CLN3(1201)	NU205_HUMAN	23165	NUP205	5	5	5	1	0.92	0.92	0	0.9200	0.9200
CLN3(1201)	ATP5L_HUMAN	10632	ATP5L	3	3	3	1	0.92	0.92	0	0.9180	0.9180
CLN3(1201)	STRA6_HUMAN	64220	STRA6	4	4	4	1	0.92	0.92	0	0.9180	0.9180
CLN3(1201)	PSB2_HUMAN	5690	PSMB2	4	4	4	1	0.92	0.92	0	0.9160	0.9160
CLN3(1201)	DNJB6_HUMAN	10049	DNAJB6	3	3	3	1	0.91	0.91	0	0.9140	0.9140
CLN3(1201)	FACR1_HUMAN	84188	FAR1	3	3	3	1	0.91	0.91	0	0.9120	0.9120
CLN3(1201)	ARMC6_HUMAN	93436	ARMC6	3	3	3	1	0.91	0.91	0	0.9120	0.9120
CLN3(1201)	MAGD2_HUMAN	10916	MAGED2	3	3	3	1	0.91	0.91	0	0.9100	0.9100
CLN3(1201)	LGAT1_HUMAN	9926	LPGAT1	3	3	3	1	0.90	0.90	0	0.9040	0.9040
CLN3(1201)	QIL1_HUMAN	125988	C19orf70	3	3	3	1	0.90	0.90	0	0.8980	0.8980
CLN3(1201)	FADS1_HUMAN	3992	FADS1	3	3	3	1	0.89	0.89	0	0.8900	0.8900
CLN3(1201)	CFAB_HUMAN	629	CFB	3	3	3	1	0.89	0.89	0	0.8900	0.8900
CLN3(1201)	CLP1L_HUMAN	81037	CLPTM1L	3	3	3	1	0.89	0.89	0	0.8880	0.8880
CLN3(1201)	SURF4_HUMAN	6836	SURF4	3	3	3	1	0.89	0.89	0	0.8880	0.8880
CLN3(1201)	MGST3_HUMAN	4259	MGST3	3	3	3	1	0.89	0.89	0	0.8880	0.8880
CLN3(1201)	MPV17_HUMAN	4358	MPV17	3	3	3	1	0.89	0.89	0	0.8880	0.8880
CLN3(1201)	COX15_HUMAN	1355	COX15	3	3	3	1	0.88	0.88	0	0.8800	0.8800
CLN3(1201)	SAM50_HUMAN	25813	SAMM50	3	3	3	1	0.87	0.87	0	0.8740	0.8740
CLN3(1201)	AGK_HUMAN	55750	AGK	2	2	2	1	0.87	0.87	0	0.8700	0.8700
CLN3(1201)	CDS2_HUMAN	8760	CDS2	2	2	2	1	0.85	0.85	0	0.8460	0.8460
CLN3(1201)	TM41B_HUMAN	440026	TMEM41B	2	2	2	1	0.85	0.85	0	0.8460	0.8460
CLN3(1201)	RL23_HUMAN	9349	RPL23	2	2	2	1	0.84	0.84	0	0.8380	0.8380
CLN3(1201)	KV309_HUMAN	28876	IGKV3D-11	2	2	2	1	0.84	0.84	0	0.8360	0.8360
CLN3(1201)	RL38_HUMAN	6169	RPL38	2	2	2	1	0.83	0.83	0	0.8340	0.8340
CLN3(1201)	TRY1_HUMAN	5644	PRSS1	2	2	2	1	0.83	0.83	0	0.8320	0.8320
CLN3(1201)	TMM49_HUMAN	81671	VMP1	2	2	2	1	0.83	0.83	0	0.8280	0.8280
CLN3(1201)	CAB45_HUMAN	51150	SDF4	2	2	2	1	0.83	0.83	0	0.8280	0.8280
CLN3(1201)	BDH_HUMAN	622	BDH1	2	2	2	1	0.83	0.83	0	0.8260	0.8260
CLN3(1201)	HV313_HUMAN		HV313_HUMAN	2	2	2	1	0.82	0.82	0	0.8220	0.8220
CLN3(1201)	ATPK_HUMAN	9551	ATP5J2	2	2	2	1	0.82	0.82	0	0.8220	0.8220
CLN3(1201)	M2OM_HUMAN	8402	SLC25A11	2	2	2	1	0.81	0.81	0	0.8120	0.8120
CLN3(1201)	SSRD_HUMAN	6748	SSR4	2	2	2	1	0.81	0.81	0	0.8100	0.8100
CLN3(1201)	S35B2_HUMAN	347734	SLC35B2	2	2	2	1	0.81	0.81	0	0.8100	0.8100
CLN3(1201)	AIFM1_HUMAN	9131	AIFM1	2	2	2	1	0.81	0.81	0	0.8080	0.8080
CLN3(1201)	HAX1_HUMAN	10456	HAX1	2	2	2	1	0.81	0.81	0	0.8080	0.8080
CLN3(1201)	FA8A1_HUMAN	51439	FAM8A1	2	2	2	1	0.80	0.80	0	0.8040	0.8040
CLN3(1201)	GPAT4_HUMAN	137964	AGPAT6	2	2	2	1	0.79	0.79	0	0.7920	0.7920
CLN3(1201)	GNAS2_HUMAN	2778	GNAS	2	2	2	1	0.79	0.79	0	0.7920	0.7920
CLN3(1201)	OST48_HUMAN	1650	DDOST	2	2	2	1	0.77	0.77	0	0.7740	0.7740
CLN3(1201)	VATH_HUMAN	51606	ATP6V1H	2	2	2	1	0.77	0.77	0	0.7720	0.7720
CLN3(1201)	S61A1_HUMAN	29927	SEC61A1	2	2	2	1	0.77	0.77	0	0.7660	0.7660
CLN3(1201)	DGAT1_HUMAN	8694	DGAT1	2	2	2	1	0.76	0.76	0	0.7640	0.7640
CLN3(1201)	DYHC1_HUMAN	1778	DYNC1H1	5	5	5	1	0.75	0.75	0	0.7540	0.7540
CLN3(1201)	TM9S3_HUMAN	56889	TM9SF3	2	2	2	1	0.74	0.74	0	0.7440	0.7440
CLN3(1201)	MY18B_HUMAN	84700	MYO18B	3	3	3	1	0.66	0.66	0	0.6640	0.6640
CLN3(1201)	TFR1_HUMAN	7037	TFRC	2	2	2	1	0.66	0.66	0	0.6620	0.6620
CLN3(1201)	TBB5_HUMAN	203068	TUBB	131	131	131	1	0.66	0.66	16	0.6580	0.6580
CLN3(1201)	MAGD1_HUMAN	9500	MAGED1	2	2	2	1	0.61	0.61	0	0.6120	0.6120
CLN3(1201)	COPG2_HUMAN	26958	COPG2	2	2	2	1	0.60	0.60	0	0.5980	0.5980
CLN3(1201)	XPO2_HUMAN	1434	CSE1L	2	2	2	1	0.56	0.56	0	0.5640	0.5640
CLN3(1201)	MAP1B_HUMAN	4131	MAP1B	3	3	3	1	0.55	0.55	0	0.5460	0.5460
CLN3(1201)	MPCP_HUMAN	5250	SLC25A3	14	14	14	1	0.51	0.51	2	0.5120	0.5120
CLN3(1201)	TTI1_HUMAN	9675	TTI1	2	2	2	1	0.51	0.51	0	0.5080	0.5080
CLN3(1201)	RS27A_HUMAN	6233	RPS27A	5	5	5	1	0.44	0.44	1	0.4360	0.4360
CLN3(1201)	TBA1A_HUMAN	7846	TUBA1A	69	69	69	1	0.41	0.41	10	0.4100	0.4100
CLN3(1201)	ATPB_HUMAN	506	ATP5B	6	6	6	1	0.37	0.37	1	0.3700	0.3700
CLN3(1201)	TBB3_HUMAN	10381	TUBB3	80	80	80	1	0.37	0.37	13	0.3660	0.3660
CLN3(1201)	HV316_HUMAN		HV316_HUMAN	2	2	2	1	0.04	0.04	1	0.0400	0.0400
CLN3(1201)	ATPA_HUMAN	498	ATP5A1	7	7	7	1	0.00	0.00	3	0.0020	0.0020
CLN3(1201)	KV306_HUMAN		KV306_HUMAN	1	1	1	1	0.00	0.00	0	0.0000	0.0000
CLN3(1201)	DSG1_HUMAN	1828	DSG1	2	2	2	1	0.00	0.00	6	0.0000	0.0000
CLN3(1201)	LTN1_HUMAN	26046	LTN1	1	1	1	1	0.00	0.00	0	0.0000	0.0000
CLN3(1201)	GTR1_HUMAN	6513	SLC2A1	1	1	1	1	0.00	0.00	0	0.0000	0.0000
CLN3(1201)	ATD3A_HUMAN	55210	ATAD3A	1	1	1	1	0.00	0.00	0	0.0000	0.0000
CLN3(1201)	CDSN_HUMAN	1041	CDSN	1	1	1	1	0.00	0.00	1	0.0000	0.0000
CLN3(1201)	MLF2_HUMAN	8079	MLF2	1	1	1	1	0.00	0.00	0	0.0000	0.0000
CLN3(1201)	CLN6_HUMAN	54982	CLN6	1	1	1	1	0.00	0.00	0	0.0000	0.0000
CLN3(1201)	PEX3_HUMAN	8504	PEX3	1	1	1	1	0.00	0.00	0	0.0000	0.0000
CLN3(1201)	TELO2_HUMAN	9894	TELO2	1	1	1	1	0.00	0.00	0	0.0000	0.0000
CLN3(1201)	IMB1_HUMAN	3837	KPNB1	1	1	1	1	0.00	0.00	0	0.0000	0.0000
CLN3(1201)	HV320_HUMAN		HV320_HUMAN	1	1	1	1	0.00	0.00	0	0.0000	0.0000
CLN3(1201)	CH60_HUMAN	3329	HSPD1	1	1	1	1	0.00	0.00	0	0.0000	0.0000
CLN3(1201)	OSTC_HUMAN	58505	OSTC	1	1	1	1	0.00	0.00	0	0.0000	0.0000
CLN3(1201)	S11IP_HUMAN	114790	STK11IP	1	1	1	1	0.00	0.00	0	0.0000	0.0000
CLN3(1201)	DSC1_HUMAN	1823	DSC1	2	2	2	1	0.00	0.00	5	0.0000	0.0000
CLN3(1201)	HCD2_HUMAN	3028	HSD17B10	1	1	1	1	0.00	0.00	0	0.0000	0.0000
CLN3(1201)	SC16A_HUMAN	9919	SEC16A	1	1	1	1	0.00	0.00	0	0.0000	0.0000
CLN3(1201)	OXA1L_HUMAN	5018	OXA1L	1	1	1	1	0.00	0.00	0	0.0000	0.0000
CLN3(1201)	K2013_HUMAN	90231	KIAA2013	1	1	1	1	0.00	0.00	0	0.0000	0.0000
CLN3(1201)	CISD1_HUMAN	55847	CISD1	1	1	1	1	0.00	0.00	0	0.0000	0.0000
CLN3(1201)	T126A_HUMAN	84233	TMEM126A	1	1	1	1	0.00	0.00	0	0.0000	0.0000
CLN3(1201)	HM13_HUMAN	81502	HM13	1	1	1	1	0.00	0.00	0	0.0000	0.0000
CLN3(1201)	COPA_HUMAN	1314	COPA	1	1	1	1	0.00	0.00	0	0.0000	0.0000
CLN3(1201)	S2546_HUMAN	91137	SLC25A46	1	1	1	1	0.00	0.00	0	0.0000	0.0000
CLN3(1201)	EF2_HUMAN	1938	EEF2	1	1	1	1	0.00	0.00	0	0.0000	0.0000
CLN3(1201)	GTPB1_HUMAN	9567	GTPBP1	1	1	1	1	0.00	0.00	0	0.0000	0.0000
CLN3(1201)	IGKC_HUMAN	3514	IGKC	12	12	12	1	0.00	0.00	5	0.0000	0.0000
CLN3(1201)	ATP5I_HUMAN	521	ATP5I	1	1	1	1	0.00	0.00	0	0.0000	0.0000
CLN3(1201)	ARL1_HUMAN	400	ARL1	1	1	1	1	0.00	0.00	0	0.0000	0.0000
CLN3(1201)	S2540_HUMAN	55972	SLC25A40	1	1	1	1	0.00	0.00	0	0.0000	0.0000
CLN3(1201)	SCD5_HUMAN	79966	SCD5	1	1	1	1	0.00	0.00	0	0.0000	0.0000
CLN3(1201)	COPD_HUMAN	372	ARCN1	1	1	1	1	0.00	0.00	0	0.0000	0.0000
CLN3(1201)	ANR52_HUMAN	283373	ANKRD52	1	1	1	1	0.00	0.00	0	0.0000	0.0000
CLN3(1201)	PLCX2_HUMAN	257068	PLCXD2	1	1	1	1	0.00	0.00	0	0.0000	0.0000
CLN3(1201)	CEPT1_HUMAN	10390	CEPT1	1	1	1	1	0.00	0.00	0	0.0000	0.0000
CLN3(1201)	NFASC_HUMAN	23114	NFASC	1	1	1	1	0.00	0.00	0	0.0000	0.0000
CLN3(1201)	TI23B_HUMAN	653252	TIMM23B	1	1	1	1	0.00	0.00	0	0.0000	0.0000
CLN3(1201)	S35E1_HUMAN	79939	SLC35E1	1	1	1	1	0.00	0.00	0	0.0000	0.0000
CLN3(1201)	AMFR2_HUMAN	267	AMFR	1	1	1	1	0.00	0.00	0	0.0000	0.0000
CLN3(1201)	LV204_HUMAN		LV204_HUMAN	1	1	1	1	0.00	0.00	0	0.0000	0.0000
CLN3(1201)	DERL1_HUMAN	79139	DERL1	1	1	1	1	0.00	0.00	0	0.0000	0.0000
CLN3(1201)	TI17B_HUMAN	10245	TIMM17B	1	1	1	1	0.00	0.00	0	0.0000	0.0000
CLN3(1201)	SPNS1_HUMAN	83985	SPNS1	1	1	1	1	0.00	0.00	0	0.0000	0.0000
CLN3(1201)	T120A_HUMAN	83862	TMEM120A	1	1	1	1	0.00	0.00	0	0.0000	0.0000
CLN3(1201)	RS3_HUMAN	6188	RPS3	1	1	1	1	0.00	0.00	0	0.0000	0.0000
CLN3(1201)	SC61B_HUMAN	10952	SEC61B	1	1	1	1	0.00	0.00	0	0.0000	0.0000
CLN3(1201)	MYO19_HUMAN	80179	MYO19	1	1	1	1	0.00	0.00	0	0.0000	0.0000
CLN3(1201)	CYTA_HUMAN	1475	CSTA	1	1	1	1	0.00	0.00	2	0.0000	0.0000
CLN3(1201)	H90B2_HUMAN	391634	HSP90AB2P	1	1	1	1	0.00	0.00	0	0.0000	0.0000
CLN3(1201)	TRAM1_HUMAN	23471	TRAM1	1	1	1	1	0.00	0.00	0	0.0000	0.0000
CLN3(1201)	NDUA4_HUMAN	4697	NDUFA4	1	1	1	1	0.00	0.00	0	0.0000	0.0000
CLN3(1201)	SHRM3_HUMAN	57619	SHROOM3	1	1	1	1	0.00	0.00	1	0.0000	0.0000
CLN3(1201)	TMM43_HUMAN	79188	TMEM43	1	1	1	1	0.00	0.00	0	0.0000	0.0000
CLN3(1201)	VIME_HUMAN	7431	VIM	2	2	2	1	0.00	0.00	2	0.0000	0.0000
CLN3(1201)	HORN_HUMAN	388697	HRNR	17	17	17	1	0.00	0.00	27	0.0000	0.0000
CLN3(1201)	KV119_HUMAN		KV119_HUMAN	1	1	1	1	0.00	0.00	0	0.0000	0.0000
CLN3(1201)	TRY3_HUMAN	5646	PRSS3	1	1	1	1	0.00	0.00	0	0.0000	0.0000
CLN3(1201)	K1C10_HUMAN	3858	KRT10	66	66	66	1	0.00	0.00	101	0.0000	0.0000
CLN3(1201)	ALBU_HUMAN	213	ALB	5	5	5	1	0.00	0.00	13	0.0000	0.0000
CLN3(1201)	ACTB_HUMAN	60	ACTB	5	5	5	1	0.00	0.00	3	0.0000	0.0000
CLN3(1201)	K2C5_HUMAN	3852	KRT5	16	16	16	1	0.00	0.00	51	0.0000	0.0000
CLN3(1201)	STT3A_HUMAN	3703	STT3A	1	1	1	1	0.00	0.00	0	0.0000	0.0000
CLN3(1201)	LAC2_HUMAN	3538	IGLC2	10	10	10	1	0.00	0.00	5	0.0000	0.0000
CLN3(1201)	APOOL_HUMAN	139322	APOOL	1	1	1	1	0.00	0.00	0	0.0000	0.0000
CLN3(1201)	PLCE_HUMAN	55326	AGPAT5	1	1	1	1	0.00	0.00	0	0.0000	0.0000
CLN3(1201)	SSRG_HUMAN	6747	SSR3	1	1	1	1	0.00	0.00	0	0.0000	0.0000
CLN3(1201)	RO60_HUMAN	6738	TROVE2	1	1	1	1	0.00	0.00	0	0.0000	0.0000
CLN3(1201)	USMG5_HUMAN	84833	USMG5	1	1	1	1	0.00	0.00	0	0.0000	0.0000
CLN3(1201)	KV106_HUMAN		KV106_HUMAN	1	1	1	1	0.00	0.00	0	0.0000	0.0000
CLN3(1201)	K22E_HUMAN	3849	KRT2	47	47	47	1	0.00	0.00	80	0.0000	0.0000
CLN3(1201)	XPO5_HUMAN	57510	XPO5	1	1	1	1	0.00	0.00	0	0.0000	0.0000
CLN3(1201)	DESP_HUMAN	1832	DSP	5	5	5	1	0.00	0.00	3	0.0000	0.0000
CLN3(1201)	DCD_HUMAN	117159	DCD	2	2	2	1	0.00	0.00	8	0.0000	0.0000
CLN3(1201)	KV402_HUMAN		KV402_HUMAN	1	1	1	1	0.00	0.00	0	0.0000	0.0000
CLN3(1201)	K1C9_HUMAN	3857	KRT9	60	60	60	1	0.00	0.00	119	0.0000	0.0000
CLN3(1201)	LAC1_HUMAN	3537	IGLC1	3	3	3	1	0.00	0.00	3	0.0000	0.0000
CLN3(1201)	K2C1_HUMAN	3848	KRT1	91	91	91	1	0.00	0.00	204	0.0000	0.0000
CLN3(1201)	MSI1H_HUMAN	4440	MSI1	1	1	1	1	0.00	0.00	0	0.0000	0.0000
CLN3(1201)	DERL2_HUMAN	51009	DERL2	1	1	1	1	0.00	0.00	0	0.0000	0.0000
CLN3(1201)	IGHG1_HUMAN	3500	IGHG1	27	27	27	1	0.00	0.00	27	0.0000	0.0000
CLN3(1201)	K2C6B_HUMAN	3854	KRT6B	29	29	29	1	0.00	0.00	79	0.0000	0.0000
CLN3(1201)	SC5A6_HUMAN	8884	SLC5A6	1	1	1	1	0.00	0.00	0	0.0000	0.0000
CLN3(1201)	HV303_HUMAN	28442	IGHV3-23	1	1	1	1	0.00	0.00	1	0.0000	0.0000
CLN3(1201)	MOT1_HUMAN	6566	SLC16A1	1	1	1	1	0.00	0.00	0	0.0000	0.0000
CLN3(1201)	BIG1_HUMAN	10565	ARFGEF1	1	1	1	1	0.00	0.00	0	0.0000	0.0000
CLN3(1201)	IGHG2_HUMAN	3501	IGHG2	21	21	21	1	0.00	0.00	18	0.0000	0.0000
CLN3(1201)	KDIS_HUMAN	57498	KIDINS220	1	1	1	1	0.00	0.00	0	0.0000	0.0000
CLN3(1201)	KV102_HUMAN	652694	LOC652694	2	2	2	1	0.00	0.00	2	0.0000	0.0000
CLN3(1201)	COPB_HUMAN	1315	COPB1	1	1	1	1	0.00	0.00	0	0.0000	0.0000
CLN3(1201)	ABCB6_HUMAN	10058	ABCB6	1	1	1	1	0.00	0.00	0	0.0000	0.0000
CLN3(1201)	MBOA7_HUMAN	79143	MBOAT7	1	1	1	1	0.00	0.00	0	0.0000	0.0000
CLN3(1201)	SYRM_HUMAN	57038	RARS2	1	1	1	1	0.00	0.00	0	0.0000	0.0000
CLN3(1201)	SNG3_HUMAN	9143	SYNGR3	1	1	1	1	0.00	0.00	0	0.0000	0.0000
CLN3(1201)	FILA2_HUMAN	388698	FLG2	1	1	1	1	0.00	0.00	4	0.0000	0.0000
CLN3(1201)	SCAM4_HUMAN	113178	SCAMP4	1	1	1	1	0.00	0.00	0	0.0000	0.0000
CLN3(1201)	MMS19_HUMAN	64210	MMS19	1	1	1	1	0.00	0.00	0	0.0000	0.0000
CLN3(1201)	UBAC2_HUMAN	337867	UBAC2	1	1	1	1	0.00	0.00	0	0.0000	0.0000
CLN3(1201)	K1C16_HUMAN	3868	KRT16	15	15	15	1	0.00	0.00	39	0.0000	0.0000
CLN3(1201)	T184C_HUMAN	55751	TMEM184C	1	1	1	1	0.00	0.00	0	0.0000	0.0000
CLN3(1201)	ELOV5_HUMAN	60481	ELOVL5	1	1	1	1	0.00	0.00	0	0.0000	0.0000
CLN3(1201)	RL24_HUMAN	6152	RPL24	1	1	1	1	0.00	0.00	0	0.0000	0.0000
CLN3(1201)	K2C6A_HUMAN	3853	KRT6A	15	15	15	1	0.00	0.00	52	0.0000	0.0000
CLN3(1201)	K1C14_HUMAN	3861	KRT14	15	15	15	1	0.00	0.00	31	0.0000	0.0000
CLN3(1201)	ERG24_HUMAN	7108	TM7SF2	1	1	1	1	0.00	0.00	0	0.0000	0.0000
CLN3(1201)	KV201_HUMAN	28916	IGKV2-40	1	1	1	1	0.00	0.00	0	0.0000	0.0000
CLN3(1201)	S10A7_HUMAN	6278	S100A7	1	1	1	1	0.00	0.00	1	0.0000	0.0000
CLN3(1201)	CB018_HUMAN	54978	C2orf18	1	1	1	1	0.00	0.00	0	0.0000	0.0000
CLN3(1201)	CDK1_HUMAN	983	CDK1	1	1	1	1	0.00	0.00	0	0.0000	0.0000
Legend: SAINT analysis of protein complexes isolated from SH-SY5Y-NTAP-CLN3 stable cells subjected to TAP-MS, is shown. Human full length TAP-tagged CLN3 served as the bait. Several prey proteins associated with the CLN3 bait are indicated by Gene name (PreyGeneName) and unique Gene Identifiers (PreyGeneID from NCBI). Abbreviations: ID, identification; Spec, Spectral counts; Rep, Replicates; Prob…

## Sheet: Scifo et Suppl Table 1_Exp. 2
Supplementary Table 1: Unfiltered list of proteins isolated from SH-SY5Y-NTAP-CLN3 stable cells_Exp.2
Saint Bait	Prey	PreyGeneID	PreyGeneName	Spec	Total Spec	Max Spec	Number Rep	Prob	iProb	ctrlCounts	Avg SAINT	Max SAINT
CLN3(1201)	IMMT_HUMAN	10989	IMMT	32	32	32	1	1.00	1.00	0	1.0000	1.0000
CLN3(1201)	AT2A2_HUMAN	488	ATP2A2	24	24	24	1	1.00	1.00	0	1.0000	1.0000
CLN3(1201)	GCN1L_HUMAN	10985	GCN1L1	40	40	40	1	1.00	1.00	1	1.0000	1.0000
CLN3(1201)	PRKDC_HUMAN	5591	PRKDC	20	20	20	1	1.00	1.00	0	1.0000	1.0000
CLN3(1201)	CPT1A_HUMAN	1374	CPT1A	18	18	18	1	1.00	1.00	0	1.0000	1.0000
CLN3(1201)	ADT1_HUMAN	291	SLC25A4	23	23	23	1	1.00	1.00	0	1.0000	1.0000
CLN3(1201)	XPO1_HUMAN	7514	XPO1	18	18	18	1	1.00	1.00	0	1.0000	1.0000
CLN3(1201)	RPN2_HUMAN	6185	RPN2	16	16	16	1	1.00	1.00	0	0.9980	0.9980
CLN3(1201)	K2C3_HUMAN	3850	KRT3	22	22	22	1	1.00	1.00	0	0.9980	0.9980
CLN3(1201)	DHB12_HUMAN	51144	HSD17B12	13	13	13	1	1.00	1.00	0	0.9960	0.9960
CLN3(1201)	IGLL5_HUMAN	100423062	IGLL5	8	8	8	1	0.99	0.99	0	0.9940	0.9940
CLN3(1201)	TECR_HUMAN	9524	TECR	10	10	10	1	0.99	0.99	0	0.9940	0.9940
CLN3(1201)	SSRD_HUMAN	6748	SSR4	9	9	9	1	0.99	0.99	0	0.9940	0.9940
CLN3(1201)	ARF4_HUMAN	378	ARF4	11	11	11	1	0.99	0.99	0	0.9920	0.9920
CLN3(1201)	SURF4_HUMAN	6836	SURF4	8	8	8	1	0.99	0.99	0	0.9880	0.9880
CLN3(1201)	RS27_HUMAN	6232	RPS27	5	5	5	1	0.99	0.99	0	0.9860	0.9860
CLN3(1201)	SFXN3_HUMAN	81855	SFXN3	12	12	12	1	0.98	0.98	1	0.9800	0.9800
CLN3(1201)	RS15A_HUMAN	6210	RPS15A	7	7	7	1	0.98	0.98	0	0.9800	0.9800
CLN3(1201)	HSPB1_HUMAN	3315	HSPB1	6	6	6	1	0.98	0.98	0	0.9800	0.9800
CLN3(1201)	K2C74_HUMAN	121391	KRT74	10	10	10	1	0.98	0.98	0	0.9760	0.9760
CLN3(1201)	CMC2_HUMAN	10165	SLC25A13	25	25	25	1	0.96	0.96	4	0.9640	0.9640
CLN3(1201)	RPN1_HUMAN	6184	RPN1	7	7	7	1	0.96	0.96	0	0.9620	0.9620
CLN3(1201)	XPO5_HUMAN	57510	XPO5	5	5	5	1	0.96	0.96	0	0.9560	0.9560
CLN3(1201)	ARF5_HUMAN	381	ARF5	4	4	4	1	0.94	0.94	0	0.9420	0.9420
CLN3(1201)	RTL1_HUMAN	388015	RTL1	11	11	11	1	0.94	0.94	1	0.9420	0.9420
CLN3(1201)	CDS2_HUMAN	8760	CDS2	5	5	5	1	0.94	0.94	0	0.9360	0.9360
CLN3(1201)	QIL1_HUMAN	125988	C19orf70	4	4	4	1	0.94	0.94	0	0.9360	0.9360
CLN3(1201)	S61A1_HUMAN	29927	SEC61A1	5	5	5	1	0.93	0.93	0	0.9300	0.9300
CLN3(1201)	TMM33_HUMAN	55161	TMEM33	8	8	8	1	0.93	0.93	1	0.9260	0.9260
CLN3(1201)	ARF3_HUMAN	377	ARF3	4	4	4	1	0.93	0.93	0	0.9260	0.9260
CLN3(1201)	SAM50_HUMAN	25813	SAMM50	4	4	4	1	0.92	0.92	0	0.9160	0.9160
CLN3(1201)	SERA_HUMAN	26227	PHGDH	14	14	14	1	0.91	0.91	2	0.9120	0.9120
CLN3(1201)	MAGD2_HUMAN	10916	MAGED2	5	5	5	1	0.90	0.90	0	0.9020	0.9020
CLN3(1201)	RS2_HUMAN	6187	RPS2	5	5	5	1	0.90	0.90	0	0.9000	0.9000
CLN3(1201)	M2OM_HUMAN	8402	SLC25A11	5	5	5	1	0.90	0.90	0	0.8960	0.8960
CLN3(1201)	STT3A_HUMAN	3703	STT3A	4	4	4	1	0.89	0.89	0	0.8880	0.8880
CLN3(1201)	RO60_HUMAN	6738	TROVE2	11	11	11	1	0.89	0.89	1	0.8860	0.8860
CLN3(1201)	SFXN1_HUMAN	94081	SFXN1	4	4	4	1	0.89	0.89	0	0.8860	0.8860
CLN3(1201)	XPOT_HUMAN	11260	XPOT	10	10	10	1	0.88	0.88	1	0.8780	0.8780
CLN3(1201)	COX15_HUMAN	1355	COX15	4	4	4	1	0.87	0.87	0	0.8740	0.8740
CLN3(1201)	DHCR7_HUMAN	1717	DHCR7	4	4	4	1	0.87	0.87	0	0.8740	0.8740
CLN3(1201)	AF1Q_HUMAN	10962	MLLT11	3	3	3	1	0.87	0.87	0	0.8700	0.8700
CLN3(1201)	MPU1_HUMAN	9526	MPDU1	3	3	3	1	0.80	0.80	0	0.8000	0.8000
CLN3(1201)	QCR2_HUMAN	7385	UQCRC2	3	3	3	1	0.80	0.80	0	0.7960	0.7960
CLN3(1201)	AT1B1_HUMAN	481	ATP1B1	3	3	3	1	0.79	0.79	0	0.7900	0.7900
CLN3(1201)	RER1_HUMAN	11079	RER1	3	3	3	1	0.78	0.78	0	0.7820	0.7820
CLN3(1201)	RS3_HUMAN	6188	RPS3	9	9	9	1	0.78	0.78	2	0.7800	0.7800
CLN3(1201)	OST48_HUMAN	1650	DDOST	3	3	3	1	0.78	0.78	0	0.7760	0.7760
CLN3(1201)	NRIP2_HUMAN	83714	NRIP2	3	3	3	1	0.77	0.77	0	0.7720	0.7720
CLN3(1201)	TM165_HUMAN	55858	TMEM165	3	3	3	1	0.77	0.77	0	0.7700	0.7700
CLN3(1201)	CHCH3_HUMAN	54927	CHCHD3	3	3	3	1	0.75	0.75	0	0.7480	0.7480
CLN3(1201)	STRA6_HUMAN	64220	STRA6	3	3	3	1	0.75	0.75	0	0.7480	0.7480
CLN3(1201)	S35B2_HUMAN	347734	SLC35B2	3	3	3	1	0.74	0.74	0	0.7380	0.7380
CLN3(1201)	TFR1_HUMAN	7037	TFRC	3	3	3	1	0.72	0.72	0	0.7220	0.7220
CLN3(1201)	NDUA4_HUMAN	4697	NDUFA4	2	2	2	1	0.69	0.69	0	0.6860	0.6860
CLN3(1201)	USMG5_HUMAN	84833	USMG5	2	2	2	1	0.68	0.68	0	0.6800	0.6800
CLN3(1201)	ATPA_HUMAN	498	ATP5A1	11	11	11	1	0.68	0.68	2	0.6780	0.6780
CLN3(1201)	ATPK_HUMAN	9551	ATP5J2	2	2	2	1	0.67	0.67	0	0.6680	0.6680
CLN3(1201)	KV310_HUMAN		KV310_HUMAN	2	2	2	1	0.67	0.67	0	0.6660	0.6660
CLN3(1201)	RS18_HUMAN	6222	RPS18	2	2	2	1	0.64	0.64	0	0.6440	0.6440
CLN3(1201)	HACD3_HUMAN	51495	PTPLAD1	8	8	8	1	0.64	0.64	2	0.6420	0.6420
CLN3(1201)	XPO2_HUMAN	1434	CSE1L	3	3	3	1	0.64	0.64	0	0.6420	0.6420
CLN3(1201)	CDIPT_HUMAN	10423	CDIPT	2	2	2	1	0.62	0.62	0	0.6160	0.6160
CLN3(1201)	DNJA1_HUMAN	3301	DNAJA1	6	6	6	1	0.62	0.62	1	0.6160	0.6160
CLN3(1201)	RS16_HUMAN	6217	RPS16	2	2	2	1	0.60	0.60	0	0.5960	0.5960
CLN3(1201)	SGMR1_HUMAN	10280	SIGMAR1	2	2	2	1	0.59	0.59	0	0.5920	0.5920
CLN3(1201)	ERD21_HUMAN	10945	KDELR1	2	2	2	1	0.58	0.58	0	0.5760	0.5760
CLN3(1201)	TI23B_HUMAN	653252	TIMM23B	2	2	2	1	0.57	0.57	0	0.5680	0.5680
CLN3(1201)	APOOL_HUMAN	139322	APOOL	2	2	2	1	0.56	0.56	0	0.5580	0.5580
CLN3(1201)	RTN1_HUMAN	6252	RTN1	2	2	2	1	0.56	0.56	0	0.5560	0.5560
CLN3(1201)	RS13_HUMAN	6207	RPS13	2	2	2	1	0.55	0.55	0	0.5480	0.5480
CLN3(1201)	EMD_HUMAN	2010	EMD	2	2	2	1	0.54	0.54	0	0.5360	0.5360
CLN3(1201)	NIPS1_HUMAN	8508	NIPSNAP1	2	2	2	1	0.53	0.53	0	0.5340	0.5340
CLN3(1201)	SPNS1_HUMAN	83985	SPNS1	2	2	2	1	0.53	0.53	0	0.5320	0.5320
CLN3(1201)	PHB2_HUMAN	11331	PHB2	2	2	2	1	0.53	0.53	0	0.5300	0.5300
CLN3(1201)	AIFM1_HUMAN	9131	AIFM1	2	2	2	1	0.52	0.52	0	0.5200	0.5200
CLN3(1201)	ACOD_HUMAN	6319	SCD	2	2	2	1	0.52	0.52	0	0.5160	0.5160
CLN3(1201)	CB018_HUMAN	54978	C2orf18	2	2	2	1	0.51	0.51	0	0.5060	0.5060
CLN3(1201)	SYT1_HUMAN	6857	SYT1	2	2	2	1	0.51	0.51	0	0.5060	0.5060
CLN3(1201)	FADS2_HUMAN	9415	FADS2	2	2	2	1	0.50	0.50	0	0.5040	0.5040
CLN3(1201)	BLMH_HUMAN	642	BLMH	2	2	2	1	0.45	0.45	0	0.4540	0.4540
CLN3(1201)	KRT81_HUMAN	3887	KRT81	2	2	2	1	0.45	0.45	0	0.4460	0.4460
CLN3(1201)	GHC1_HUMAN	79751	SLC25A22	4	4	4	1	0.36	0.36	1	0.3620	0.3620
CLN3(1201)	RS27L_HUMAN	51065	RPS27L	6	6	6	1	0.35	0.35	2	0.3540	0.3540
CLN3(1201)	MPCP_HUMAN	5250	SLC25A3	16	16	16	1	0.31	0.31	5	0.3100	0.3100
CLN3(1201)	IPO9_HUMAN	55705	IPO9	3	3	3	1	0.30	0.30	1	0.3020	0.3020
CLN3(1201)	COPA_HUMAN	1314	COPA	3	3	3	1	0.30	0.30	0	0.3000	0.3000
CLN3(1201)	PSD4_HUMAN	23550	PSD4	3	3	3	1	0.28	0.28	1	0.2780	0.2780
CLN3(1201)	CALU_HUMAN	813	CALU	3	3	3	1	0.22	0.22	1	0.2240	0.2240
CLN3(1201)	SPB12_HUMAN	89777	SERPINB12	3	3	3	1	0.21	0.21	1	0.2080	0.2080
CLN3(1201)	ESYT2_HUMAN	57488	ESYT2	2	2	2	1	0.18	0.18	0	0.1760	0.1760
CLN3(1201)	ADT3_HUMAN	293	SLC25A6	27	27	27	1	0.16	0.16	8	0.1600	0.1600
CLN3(1201)	COPB_HUMAN	1315	COPB1	2	2	2	1	0.15	0.15	0	0.1540	0.1540
CLN3(1201)	TXTP_HUMAN	6576	SLC25A1	6	6	6	1	0.11	0.11	2	0.1120	0.1120
CLN3(1201)	DPM1_HUMAN	8813	DPM1	5	5	5	1	0.08	0.08	2	0.0780	0.0780
CLN3(1201)	NU205_HUMAN	23165	NUP205	3	3	3	1	0.04	0.04	0	0.0440	0.0440
CLN3(1201)	RS11_HUMAN	6205	RPS11	2	2	2	1	0.03	0.03	1	0.0260	0.0260
CLN3(1201)	SNG3_HUMAN	9143	SYNGR3	2	2	2	1	0.02	0.02	1	0.0240	0.0240
CLN3(1201)	HV313_HUMAN		HV313_HUMAN	2	2	2	1	0.02	0.02	1	0.0200	0.0200
CLN3(1201)	ATPB_HUMAN	506	ATP5B	7	7	7	1	0.00	0.00	3	0.0020	0.0020
CLN3(1201)	KV101_HUMAN		KV101_HUMAN	3	3	3	1	0.00	0.00	2	0.0020	0.0020
CLN3(1201)	SCD5_HUMAN	79966	SCD5	1	1	1	1	0.00	0.00	0	0.0000	0.0000
CLN3(1201)	RAB12_HUMAN	201475	RAB12	1	1	1	1	0.00	0.00	0	0.0000	0.0000
CLN3(1201)	MTX2_HUMAN	10651	MTX2	1	1	1	1	0.00	0.00	0	0.0000	0.0000
CLN3(1201)	HEAT6_HUMAN	63897	HEATR6	1	1	1	1	0.00	0.00	0	0.0000	0.0000
CLN3(1201)	SPR1B_HUMAN	6699	SPRR1B	1	1	1	1	0.00	0.00	2	0.0000	0.0000
CLN3(1201)	TM41B_HUMAN	440026	TMEM41B	1	1	1	1	0.00	0.00	0	0.0000	0.0000
CLN3(1201)	DGAT1_HUMAN	8694	DGAT1	1	1	1	1	0.00	0.00	0	0.0000	0.0000
CLN3(1201)	PRDX2_HUMAN	7001	PRDX2	1	1	1	1	0.00	0.00	0	0.0000	0.0000
CLN3(1201)	A2ML1_HUMAN	144568	A2ML1	1	1	1	1	0.00	0.00	0	0.0000	0.0000
CLN3(1201)	LV301_HUMAN		LV301_HUMAN	1	1	1	1	0.00	0.00	0	0.0000	0.0000
CLN3(1201)	LORI_HUMAN	4014	LOR	1	1	1	1	0.00	0.00	0	0.0000	0.0000
CLN3(1201)	CATD_HUMAN	1509	CTSD	1	1	1	1	0.00	0.00	0	0.0000	0.0000
CLN3(1201)	HACD2_HUMAN	201562	PTPLB	1	1	1	1	0.00	0.00	0	0.0000	0.0000
CLN3(1201)	LASS2_HUMAN	29956	CERS2	1	1	1	1	0.00	0.00	0	0.0000	0.0000
CLN3(1201)	SPR2G_HUMAN	6706	SPRR2G	1	1	1	1	0.00	0.00	2	0.0000	0.0000
CLN3(1201)	H2B2F_HUMAN	440689	HIST2H2BF	1	1	1	1	0.00	0.00	1	0.0000	0.0000
CLN3(1201)	S10AG_HUMAN	140576	S100A16	1	1	1	1	0.00	0.00	0	0.0000	0.0000
CLN3(1201)	S35D3_HUMAN	340146	SLC35D3	1	1	1	1	0.00	0.00	0	0.0000	0.0000
CLN3(1201)	ECHB_HUMAN	3032	HADHB	1	1	1	1	0.00	0.00	0	0.0000	0.0000
CLN3(1201)	GSDMA_HUMAN	284110	GSDMA	1	1	1	1	0.00	0.00	2	0.0000	0.0000
CLN3(1201)	PPAC2_HUMAN	403313	PPAPDC2	1	1	1	1	0.00	0.00	0	0.0000	0.0000
CLN3(1201)	RAN_HUMAN	5901	RAN	1	1	1	1	0.00	0.00	0	0.0000	0.0000
CLN3(1201)	ECM29_HUMAN	23392	KIAA0368	1	1	1	1	0.00	0.00	0	0.0000	0.0000
CLN3(1201)	LAT1_HUMAN	8140	SLC7A5	1	1	1	1	0.00	0.00	0	0.0000	0.0000
CLN3(1201)	CH60_HUMAN	3329	HSPD1	1	1	1	1	0.00	0.00	4	0.0000	0.0000
CLN3(1201)	PRS8_HUMAN	5705	PSMC5	1	1	1	1	0.00	0.00	0	0.0000	0.0000
CLN3(1201)	TITIN_HUMAN	7273	TTN	3	3	3	1	0.00	0.00	2	0.0000	0.0000
CLN3(1201)	YIPF6_HUMAN	286451	YIPF6	1	1	1	1	0.00	0.00	0	0.0000	0.0000
CLN3(1201)	VDAC2_HUMAN	7417	VDAC2	1	1	1	1	0.00	0.00	0	0.0000	0.0000
CLN3(1201)	ERG24_HUMAN	7108	TM7SF2	1	1	1	1	0.00	0.00	0	0.0000	0.0000
CLN3(1201)	PHB_HUMAN	5245	PHB	1	1	1	1	0.00	0.00	0	0.0000	0.0000
CLN3(1201)	COPB2_HUMAN	9276	COPB2	1	1	1	1	0.00	0.00	0	0.0000	0.0000
CLN3(1201)	NDUS3_HUMAN	4722	NDUFS3	1	1	1	1	0.00	0.00	0	0.0000	0.0000
CLN3(1201)	NCAM1_HUMAN	4684	NCAM1	1	1	1	1	0.00	0.00	0	0.0000	0.0000
CLN3(1201)	MOT1_HUMAN	6566	SLC16A1	1	1	1	1	0.00	0.00	0	0.0000	0.0000
CLN3(1201)	CL060_HUMAN	144608	C12orf60	1	1	1	1	0.00	0.00	1	0.0000	0.0000
CLN3(1201)	HV103_HUMAN	388077	IGHV1OR15-1	1	1	1	1	0.00	0.00	0	0.0000	0.0000
CLN3(1201)	TBCD5_HUMAN	9779	TBC1D5	1	1	1	1	0.00	0.00	0	0.0000	0.0000
CLN3(1201)	GPHRB_HUMAN	51463	GPR89B	1	1	1	1	0.00	0.00	0	0.0000	0.0000
CLN3(1201)	LV104_HUMAN		LV104_HUMAN	1	1	1	1	0.00	0.00	1	0.0000	0.0000
CLN3(1201)	MENTO_HUMAN	83930	STARD3NL	1	1	1	1	0.00	0.00	0	0.0000	0.0000
CLN3(1201)	TIM50_HUMAN	92609	TIMM50	1	1	1	1	0.00	0.00	0	0.0000	0.0000
CLN3(1201)	IMB1_HUMAN	3837	KPNB1	1	1	1	1	0.00	0.00	0	0.0000	0.0000
CLN3(1201)	MBOA7_HUMAN	79143	MBOAT7	1	1	1	1	0.00	0.00	0	0.0000	0.0000
CLN3(1201)	PLCD_HUMAN	56895	AGPAT4	1	1	1	1	0.00	0.00	0	0.0000	0.0000
CLN3(1201)	CLP1L_HUMAN	81037	CLPTM1L	1	1	1	1	0.00	0.00	0	0.0000	0.0000
CLN3(1201)	MAP1B_HUMAN	4131	MAP1B	1	1	1	1	0.00	0.00	0	0.0000	0.0000
CLN3(1201)	PROF1_HUMAN	5216	PFN1	1	1	1	1	0.00	0.00	0	0.0000	0.0000
CLN3(1201)	TCPZ_HUMAN	908	CCT6A	1	1	1	1	0.00	0.00	0	0.0000	0.0000
CLN3(1201)	ALG1_HUMAN	56052	ALG1	1	1	1	1	0.00	0.00	0	0.0000	0.0000
CLN3(1201)	ABCA3_HUMAN	21	ABCA3	1	1	1	1	0.00	0.00	0	0.0000	0.0000
CLN3(1201)	CDK1_HUMAN	983	CDK1	1	1	1	1	0.00	0.00	0	0.0000	0.0000
CLN3(1201)	EF2_HUMAN	1938	EEF2	1	1	1	1	0.00	0.00	2	0.0000	0.0000
CLN3(1201)	NCLN_HUMAN	56926	NCLN	1	1	1	1	0.00	0.00	0	0.0000	0.0000
CLN3(1201)	VACHT_HUMAN	6572	SLC18A3	1	1	1	1	0.00	0.00	0	0.0000	0.0000
CLN3(1201)	T184C_HUMAN	55751	TMEM184C	1	1	1	1	0.00	0.00	0	0.0000	0.0000
CLN3(1201)	CDSN_HUMAN	1041	CDSN	1	1	1	1	0.00	0.00	1	0.0000	0.0000
CLN3(1201)	PLCE_HUMAN	55326	AGPAT5	1	1	1	1	0.00	0.00	0	0.0000	0.0000
CLN3(1201)	CC001_HUMAN	51300	TIMMDC1	1	1	1	1	0.00	0.00	0	0.0000	0.0000
CLN3(1201)	NDKA_HUMAN	4830	NME1	1	1	1	1	0.00	0.00	0	0.0000	0.0000
CLN3(1201)	LV106_HUMAN		LV106_HUMAN	1	1	1	1	0.00	0.00	0	0.0000	0.0000
CLN3(1201)	DERL1_HUMAN	79139	DERL1	1	1	1	1	0.00	0.00	0	0.0000	0.0000
CLN3(1201)	T120A_HUMAN	83862	TMEM120A	1	1	1	1	0.00	0.00	0	0.0000	0.0000
CLN3(1201)	SSRA_HUMAN	6745	SSR1	1	1	1	1	0.00	0.00	0	0.0000	0.0000
CLN3(1201)	ATD3B_HUMAN	83858	ATAD3B	1	1	1	1	0.00	0.00	0	0.0000	0.0000
CLN3(1201)	PLD3_HUMAN	23646	PLD3	1	1	1	1	0.00	0.00	0	0.0000	0.0000
CLN3(1201)	KV309_HUMAN	28876	IGKV3D-11	1	1	1	1	0.00	0.00	2	0.0000	0.0000
CLN3(1201)	TOM22_HUMAN	56993	TOMM22	1	1	1	1	0.00	0.00	0	0.0000	0.0000
CLN3(1201)	ACM3_HUMAN	1131	CHRM3	1	1	1	1	0.00	0.00	0	0.0000	0.0000
CLN3(1201)	SHRM3_HUMAN	57619	SHROOM3	1	1	1	1	0.00	0.00	1	0.0000	0.0000
CLN3(1201)	PLCX2_HUMAN	257068	PLCXD2	1	1	1	1	0.00	0.00	0	0.0000	0.0000
CLN3(1201)	SC22B_HUMAN	9554	SEC22B	1	1	1	1	0.00	0.00	0	0.0000	0.0000
CLN3(1201)	VDAC1_HUMAN	7416	VDAC1	1	1	1	1	0.00	0.00	0	0.0000	0.0000
CLN3(1201)	PP4C_HUMAN	5531	PPP4C	1	1	1	1	0.00	0.00	0	0.0000	0.0000
CLN3(1201)	LASS1_HUMAN	10715	CERS1	1	1	1	1	0.00	0.00	0	0.0000	0.0000
CLN3(1201)	THIO_HUMAN	7295	TXN	2	2	2	1	0.00	0.00	2	0.0000	0.0000
CLN3(1201)	HSP7C_HUMAN	3312	HSPA8	9	9	9	1	0.00	0.00	14	0.0000	0.0000
CLN3(1201)	EF1A1_HUMAN	1915	EEF1A1	15	15	15	1	0.00	0.00	10	0.0000	0.0000
CLN3(1201)	IGHG2_HUMAN	3501	IGHG2	22	22	22	1	0.00	0.00	23	0.0000	0.0000
CLN3(1201)	IGKC_HUMAN	3514	IGKC	22	22	22	1	0.00	0.00	22	0.0000	0.0000
CLN3(1201)	IGHG3_HUMAN	3502	IGHG3	24	24	24	1	0.00	0.00	25	0.0000	0.0000
CLN3(1201)	ADT2_HUMAN	292	SLC25A5	15	15	15	1	0.00	0.00	10	0.0000	0.0000
CLN3(1201)	AT1A1_HUMAN	476	ATP1A1	11	11	11	1	0.00	0.00	6	0.0000	0.0000
CLN3(1201)	DSG1_HUMAN	1828	DSG1	19	19	19	1	0.00	0.00	16	0.0000	0.0000
CLN3(1201)	K2C78_HUMAN	196374	KRT78	12	12	12	1	0.00	0.00	11	0.0000	0.0000
CLN3(1201)	K2C1B_HUMAN	374454	KRT77	10	10	10	1	0.00	0.00	10	0.0000	0.0000
CLN3(1201)	GRP78_HUMAN	3309	HSPA5	4	4	4	1	0.00	0.00	7	0.0000	0.0000
CLN3(1201)	TBAL3_HUMAN	79861	TUBAL3	7	7	7	1	0.00	0.00	4	0.0000	0.0000
CLN3(1201)	KV305_HUMAN		KV305_HUMAN	7	7	7	1	0.00	0.00	6	0.0000	0.0000
CLN3(1201)	K2C80_HUMAN	144501	KRT80	30	30	30	1	0.00	0.00	101	0.0000	0.0000
CLN3(1201)	DYHC1_HUMAN	1778	DYNC1H1	5	5	5	1	0.00	0.00	3	0.0000	0.0000
CLN3(1201)	LAC2_HUMAN	3538	IGLC2	20	20	20	1	0.00	0.00	12	0.0000	0.0000
CLN3(1201)	ACTA_HUMAN	59	ACTA2	10	10	10	1	0.00	0.00	7	0.0000	0.0000
CLN3(1201)	KPRP_HUMAN	448834	KPRP	13	13	13	1	0.00	0.00	14	0.0000	0.0000
CLN3(1201)	FILA2_HUMAN	388698	FLG2	7	7	7	1	0.00	0.00	10	0.0000	0.0000
CLN3(1201)	ACTB_HUMAN	60	ACTB	16	16	16	1	0.00	0.00	10	0.0000	0.0000
CLN3(1201)	IGHG1_HUMAN	3500	IGHG1	44	44	44	1	0.00	0.00	40	0.0000	0.0000
CLN3(1201)	K2C6A_HUMAN	3853	KRT6A	57	57	57	1	0.00	0.00	126	0.0000	0.0000
CLN3(1201)	TBB2C_HUMAN	10383	TUBB4B	96	96	96	1	0.00	0.00	83	0.0000	0.0000
CLN3(1201)	TBB4_HUMAN	10381	TUBB3	93	93	93	1	0.00	0.00	77	0.0000	0.0000
CLN3(1201)	K2C6C_HUMAN	286887	KRT6C	56	56	56	1	0.00	0.00	126	0.0000	0.0000
CLN3(1201)	TBB5_HUMAN	203068	TUBB	95	95	95	1	0.00	0.00	88	0.0000	0.0000
CLN3(1201)	K2C5_HUMAN	3852	KRT5	62	62	62	1	0.00	0.00	138	0.0000	0.0000
CLN3(1201)	K2C1_HUMAN	3848	KRT1	247	247	247	1	0.00	0.00	316	0.0000	0.0000
CLN3(1201)	K1C10_HUMAN	3858	KRT10	280	280	280	1	0.00	0.00	315	0.0000	0.0000
CLN3(1201)	K1C9_HUMAN	3857	KRT9	174	174	174	1	0.00	0.00	114	0.0000	0.0000
CLN3(1201)	TBB2A_HUMAN	7280	TUBB2A	88	88	88	1	0.00	0.00	80	0.0000	0.0000
CLN3(1201)	DESP_HUMAN	1832	DSP	37	37	37	1	0.00	0.00	26	0.0000	0.0000
CLN3(1201)	HORN_HUMAN	388697	HRNR	21	21	21	1	0.00	0.00	22	0.0000	0.0000
CLN3(1201)	TBB6_HUMAN	84617	TUBB6	49	49	49	1	0.00	0.00	47	0.0000	0.0000
CLN3(1201)	K1C17_HUMAN	3872	KRT17	21	21	21	1	0.00	0.00	22	0.0000	0.0000
CLN3(1201)	PLAK_HUMAN	3728	JUP	26	26	26	1	0.00	0.00	17	0.0000	0.0000
CLN3(1201)	K1C16_HUMAN	3868	KRT16	38	38	38	1	0.00	0.00	43	0.0000	0.0000
CLN3(1201)	K1C14_HUMAN	3861	KRT14	52	52	52	1	0.00	0.00	54	0.0000	0.0000
CLN3(1201)	TBA1A_HUMAN	7846	TUBA1A	81	81	81	1	0.00	0.00	43	0.0000	0.0000
CLN3(1201)	TBA1B_HUMAN	10376	TUBA1B	81	81	81	1	0.00	0.00	44	0.0000	0.0000
CLN3(1201)	HS90B_HUMAN	3326	HSP90AB1	4	4	4	1	0.00	0.00	4	0.0000	0.0000
CLN3(1201)	TGM3_HUMAN	7053	TGM3	5	5	5	1	0.00	0.00	3	0.0000	0.0000
CLN3(1201)	HIG1A_HUMAN	25994	HIGD1A	1	1	1	1	0.00	0.00	0	0.0000	0.0000
CLN3(1201)	LGAT1_HUMAN	9926	LPGAT1	1	1	1	1	0.00	0.00	0	0.0000	0.0000
CLN3(1201)	KV311_HUMAN		KV311_HUMAN	1	1	1	1	0.00	0.00	0	0.0000	0.0000
CLN3(1201)	ACTZ_HUMAN	10121	ACTR1A	1	1	1	1	0.00	0.00	0	0.0000	0.0000
CLN3(1201)	LCE2C_HUMAN	353140	LCE2C	1	1	1	1	0.00	0.00	1	0.0000	0.0000
CLN3(1201)	VMP1_HUMAN	81671	VMP1	1	1	1	1	0.00	0.00	0	0.0000	0.0000
CLN3(1201)	FKBP8_HUMAN	23770	FKBP8	1	1	1	1	0.00	0.00	0	0.0000	0.0000
CLN3(1201)	FACR1_HUMAN	84188	FAR1	1	1	1	1	0.00	0.00	0	0.0000	0.0000
CLN3(1201)	PCOC1_HUMAN	5118	PCOLCE	1	1	1	1	0.00	0.00	2	0.0000	0.0000
CLN3(1201)	MTFP1_HUMAN	51537	MTFP1	1	1	1	1	0.00	0.00	0	0.0000	0.0000
CLN3(1201)	DSC1_HUMAN	1823	DSC1	3	3	3	1	0.00	0.00	4	0.0000	0.0000
CLN3(1201)	RHBD2_HUMAN	57414	RHBDD2	1	1	1	1	0.00	0.00	1	0.0000	0.0000
CLN3(1201)	DHC24_HUMAN	1718	DHCR24	1	1	1	1	0.00	0.00	0	0.0000	0.0000
CLN3(1201)	HNRPU_HUMAN	3192	HNRNPU	1	1	1	1	0.00	0.00	0	0.0000	0.0000
CLN3(1201)	UBAC2_HUMAN	337867	UBAC2	1	1	1	1	0.00	0.00	0	0.0000	0.0000
CLN3(1201)	HM13_HUMAN	81502	HM13	1	1	1	1	0.00	0.00	0	0.0000	0.0000
CLN3(1201)	PSB2_HUMAN	5690	PSMB2	1	1	1	1	0.00	0.00	0	0.0000	0.0000
CLN3(1201)	ALBU_HUMAN	213	ALB	2	2	2	1	0.00	0.00	4	0.0000	0.0000
CLN3(1201)	FA36A_HUMAN	116228	FAM36A	1	1	1	1	0.00	0.00	0	0.0000	0.0000
CLN3(1201)	DCD_HUMAN	117159	DCD	1	1	1	1	0.00	0.00	1	0.0000	0.0000
CLN3(1201)	LCE1F_HUMAN	353137	LCE1F	2	2	2	1	0.00	0.00	2	0.0000	0.0000
CLN3(1201)	IGHM_HUMAN	3507	IGHM	3	3	3	1	0.00	0.00	3	0.0000	0.0000
CLN3(1201)	ARGI1_HUMAN	383	ARG1	2	2	2	1	0.00	0.00	2	0.0000	0.0000
CLN3(1201)	H4_HUMAN	554313	HIST2H4B	2	2	2	1	0.00	0.00	4	0.0000	0.0000
CLN3(1201)	CISD1_HUMAN	55847	CISD1	1	1	1	1	0.00	0.00	0	0.0000	0.0000
CLN3(1201)	XP32_HUMAN	100129271	C1orf68	4	4	4	1	0.00	0.00	6	0.0000	0.0000
CLN3(1201)	G3P_HUMAN	2597	GAPDH	3	3	3	1	0.00	0.00	5	0.0000	0.0000
CLN3(1201)	ANXA2_HUMAN	302	ANXA2	3	3	3	1	0.00	0.00	3	0.0000	0.0000
CLN3(1201)	RS27A_HUMAN	6233	RPS27A	7	7	7	1	0.00	0.00	11	0.0000	0.0000
CLN3(1201)	DOPO_HUMAN	1621	DBH	3	3	3	1	0.00	0.00	2	0.0000	0.0000
CLN3(1201)	RS4X_HUMAN	6191	RPS4X	2	2	2	1	0.00	0.00	2	0.0000	0.0000
CLN3(1201)	K22E_HUMAN	3849	KRT2	203	203	203	1	0.00	0.00	306	0.0000	0.0000
CLN3(1201)	S10A9_HUMAN	6280	S100A9	1	1	1	1	0.00	0.00	1	0.0000	0.0000
CLN3(1201)	SV2A_HUMAN	9900	SV2A	2	2	2	1	0.00	0.00	2	0.0000	0.0000
CLN3(1201)	ABCB6_HUMAN	10058	ABCB6	1	1	1	1	0.00	0.00	0	0.0000	0.0000
CLN3(1201)	COX2_HUMAN	4513	COX2	1	1	1	1	0.00	0.00	0	0.0000	0.0000
CLN3(1201)	LV302_HUMAN		LV302_HUMAN	1	1	1	1	0.00	0.00	1	0.0000	0.0000
CLN3(1201)	DNJB3_HUMAN	414061	DNAJB3	1	1	1	1	0.00	0.00	0	0.0000	0.0000
CLN3(1201)	HV316_HUMAN		HV316_HUMAN	4	4	4	1	0.00	0.00	3	0.0000	0.0000
CLN3(1201)	PKP1_HUMAN	5317	PKP1	1	1	1	1	0.00	0.00	0	0.0000	0.0000
CLN3(1201)	PRS7_HUMAN	5701	PSMC2	1	1	1	1	0.00	0.00	3	0.0000	0.0000
Legend: SAINT analysis of protein complexes isolated from SH-SY5Y-NTAP-CLN3 stable cells subjected to TAP-MS, is shown. Human full length TAP-tagged CLN3 served as the bait. Several prey proteins associated with the CLN3 bait are indicated by Gene name (PreyGeneName) and unique Gene Identifiers (PreyGeneID from NCBI). Abbreviations: ID, identification; Spec, Spectral counts; Rep, Replicates; Prob…

## Sheet: Scifo et Suppl Table 1_Exp. 3
Supplementary Table 1: Unfiltered list of proteins isolated from SH-SY5Y-NTAP-CLN3 stable cells_Exp. 3
Saint Bait	Prey	PreyGeneID	PreyGeneName	Spec	Total Spec	Max Spec	Number Rep	Prob	iProb	ctrlCounts	Avg SAINT	Max SAINT
CLN3(1201)	TBB2C_HUMAN	10383	TUBB4B	76	76	76	1	1.00	1.00	0	1.0000	1.0000
CLN3(1201)	TBB3_HUMAN	10381	TUBB3	50	50	50	1	1.00	1.00	0	1.0000	1.0000
CLN3(1201)	TBB2B_HUMAN	347733	TUBB2B	67	67	67	1	1.00	1.00	0	1.0000	1.0000
CLN3(1201)	TBA1C_HUMAN	84790	TUBA1C	77	77	77	1	1.00	1.00	6	1.0000	1.0000
CLN3(1201)	ADT2_HUMAN	292	SLC25A5	18	18	18	1	1.00	1.00	0	1.0000	1.0000
CLN3(1201)	TBB5_HUMAN	203068	TUBB	83	83	83	1	1.00	1.00	6	1.0000	1.0000
CLN3(1201)	ADT1_HUMAN	291	SLC25A4	15	15	15	1	1.00	1.00	0	1.0000	1.0000
CLN3(1201)	TBA1B_HUMAN	10376	TUBA1B	73	73	73	1	1.00	1.00	0	1.0000	1.0000
CLN3(1201)	ADT3_HUMAN	293	SLC25A6	20	20	20	1	1.00	1.00	0	0.9980	0.9980
CLN3(1201)	MPCP_HUMAN	5250	SLC25A3	11	11	11	1	0.98	0.98	0	0.9760	0.9760
CLN3(1201)	SERA_HUMAN	26227	PHGDH	13	13	13	1	0.97	0.97	0	0.9740	0.9740
CLN3(1201)	RS27A_HUMAN	6233	RPS27A	6	6	6	1	0.96	0.96	0	0.9600	0.9600
CLN3(1201)	ACTA_HUMAN	59	ACTA2	9	9	9	1	0.96	0.96	0	0.9560	0.9560
CLN3(1201)	CMC2_HUMAN	10165	SLC25A13	6	6	6	1	0.95	0.95	0	0.9520	0.9520
CLN3(1201)	ACTB_HUMAN	60	ACTB	9	9	9	1	0.95	0.95	0	0.9460	0.9460
CLN3(1201)	SPR1B_HUMAN	6699	SPRR1B	5	5	5	1	0.94	0.94	0	0.9380	0.9380
CLN3(1201)	TBAL3_HUMAN	79861	TUBAL3	4	4	4	1	0.90	0.90	0	0.8980	0.8980
CLN3(1201)	HSP7C_HUMAN	3312	HSPA8	4	4	4	1	0.86	0.86	0	0.8580	0.8580
CLN3(1201)	HACD3_HUMAN	51495	PTPLAD1	4	4	4	1	0.79	0.79	0	0.7880	0.7880
CLN3(1201)	PP4C_HUMAN	5531	PPP4C	4	4	4	1	0.78	0.78	0	0.7800	0.7800
CLN3(1201)	IMMT_HUMAN	10989	IMMT	4	4	4	1	0.67	0.67	0	0.6680	0.6680
CLN3(1201)	SURF4_HUMAN	6836	SURF4	3	3	3	1	0.66	0.66	0	0.6620	0.6620
CLN3(1201)	CPT1A_HUMAN	1374	CPT1A	4	4	4	1	0.66	0.66	0	0.6560	0.6560
CLN3(1201)	TMM33_HUMAN	55161	TMEM33	3	3	3	1	0.64	0.64	0	0.6420	0.6420
CLN3(1201)	SFXN3_HUMAN	81855	SFXN3	3	3	3	1	0.62	0.62	0	0.6200	0.6200
CLN3(1201)	QIL1_HUMAN	125988	C19orf70	2	2	2	1	0.41	0.41	0	0.4060	0.4060
CLN3(1201)	ATPK_HUMAN	9551	ATP5J2	2	2	2	1	0.39	0.39	0	0.3880	0.3880
CLN3(1201)	S10A7_HUMAN	6278	S100A7	2	2	2	1	0.36	0.36	0	0.3580	0.3580
CLN3(1201)	S10A9_HUMAN	6280	S100A9	2	2	2	1	0.35	0.35	0	0.3460	0.3460
CLN3(1201)	EF1A3_HUMAN	158078	EEF1A1P5	2	2	2	1	0.21	0.21	0	0.2060	0.2060
CLN3(1201)	DHCR7_HUMAN	1717	DHCR7	2	2	2	1	0.18	0.18	0	0.1820	0.1820
CLN3(1201)	CATA_HUMAN	847	CAT	2	2	2	1	0.16	0.16	0	0.1560	0.1560
CLN3(1201)	TGM3_HUMAN	7053	TGM3	2	2	2	1	0.00	0.00	1	0.0040	0.0040
CLN3(1201)	KV309_HUMAN	28876	IGKV3D-11	2	2	2	1	0.00	0.00	1	0.0040	0.0040
CLN3(1201)	CDS2_HUMAN	8760	CDS2	1	1	1	1	0.00	0.00	0	0.0000	0.0000
CLN3(1201)	KV201_HUMAN	28916	IGKV2-40	2	2	2	1	0.00	0.00	3	0.0000	0.0000
CLN3(1201)	RPN2_HUMAN	6185	RPN2	1	1	1	1	0.00	0.00	0	0.0000	0.0000
CLN3(1201)	GSDMA_HUMAN	284110	GSDMA	2	2	2	1	0.00	0.00	2	0.0000	0.0000
CLN3(1201)	SPB3_HUMAN	6317	SERPINB3	1	1	1	1	0.00	0.00	0	0.0000	0.0000
CLN3(1201)	DCD_HUMAN	117159	DCD	4	4	4	1	0.00	0.00	8	0.0000	0.0000
CLN3(1201)	LV302_HUMAN		LV302_HUMAN	2	2	2	1	0.00	0.00	2	0.0000	0.0000
CLN3(1201)	CDSN_HUMAN	1041	CDSN	1	1	1	1	0.00	0.00	2	0.0000	0.0000
CLN3(1201)	ATPA_HUMAN	498	ATP5A1	1	1	1	1	0.00	0.00	0	0.0000	0.0000
CLN3(1201)	LV204_HUMAN		LV204_HUMAN	1	1	1	1	0.00	0.00	1	0.0000	0.0000
CLN3(1201)	HSPB1_HUMAN	3315	HSPB1	1	1	1	1	0.00	0.00	0	0.0000	0.0000
CLN3(1201)	FNBP2_HUMAN	23380	SRGAP2	2	2	2	1	0.00	0.00	2	0.0000	0.0000
CLN3(1201)	POF1B_HUMAN	79983	POF1B	1	1	1	1	0.00	0.00	1	0.0000	0.0000
CLN3(1201)	THIO_HUMAN	7295	TXN	1	1	1	1	0.00	0.00	0	0.0000	0.0000
CLN3(1201)	CL060_HUMAN	144608	C12orf60	12	12	12	1	0.00	0.00	10	0.0000	0.0000
CLN3(1201)	DYH12_HUMAN	201625	DNAH12	2	2	2	1	0.00	0.00	3	0.0000	0.0000
CLN3(1201)	AT2A1_HUMAN	487	ATP2A1	1	1	1	1	0.00	0.00	0	0.0000	0.0000
CLN3(1201)	TCPG_HUMAN	7203	CCT3	1	1	1	1	0.00	0.00	0	0.0000	0.0000
CLN3(1201)	NRIP2_HUMAN	83714	NRIP2	1	1	1	1	0.00	0.00	0	0.0000	0.0000
CLN3(1201)	PRDX1_HUMAN	5052	PRDX1	1	1	1	1	0.00	0.00	0	0.0000	0.0000
CLN3(1201)	PLCX2_HUMAN	257068	PLCXD2	1	1	1	1	0.00	0.00	0	0.0000	0.0000
CLN3(1201)	SPR2G_HUMAN	6706	SPRR2G	1	1	1	1	0.00	0.00	2	0.0000	0.0000
CLN3(1201)	PSD4_HUMAN	23550	PSD4	6	6	6	1	0.00	0.00	3	0.0000	0.0000
CLN3(1201)	XP32_HUMAN	100129271	C1orf68	2	2	2	1	0.00	0.00	2	0.0000	0.0000
CLN3(1201)	SPB12_HUMAN	89777	SERPINB12	1	1	1	1	0.00	0.00	2	0.0000	0.0000
CLN3(1201)	NRDC_HUMAN	4898	NRD1	29	29	29	1	0.00	0.00	46	0.0000	0.0000
CLN3(1201)	APOE_HUMAN	348	APOE	2	2	2	1	0.00	0.00	2	0.0000	0.0000
CLN3(1201)	TM41B_HUMAN	440026	TMEM41B	1	1	1	1	0.00	0.00	0	0.0000	0.0000
CLN3(1201)	SHRM3_HUMAN	57619	SHROOM3	1	1	1	1	0.00	0.00	1	0.0000	0.0000
CLN3(1201)	FILA_HUMAN	2312	FLG	2	2	2	1	0.00	0.00	1	0.0000	0.0000
CLN3(1201)	KV106_HUMAN		KV106_HUMAN	1	1	1	1	0.00	0.00	1	0.0000	0.0000
CLN3(1201)	DSG1_HUMAN	1828	DSG1	11	11	11	1	0.00	0.00	21	0.0000	0.0000
CLN3(1201)	IGKC_HUMAN	3514	IGKC	34	34	34	1	0.00	0.00	31	0.0000	0.0000
CLN3(1201)	IGHG3_HUMAN	3502	IGHG3	24	24	24	1	0.00	0.00	27	0.0000	0.0000
CLN3(1201)	IGHG2_HUMAN	3501	IGHG2	30	30	30	1	0.00	0.00	43	0.0000	0.0000
CLN3(1201)	K2C1B_HUMAN	374454	KRT77	17	17	17	1	0.00	0.00	18	0.0000	0.0000
CLN3(1201)	IGLL5_HUMAN	100423062	IGLL5	16	16	16	1	0.00	0.00	14	0.0000	0.0000
CLN3(1201)	K1C10_HUMAN	3858	KRT10	744	744	744	1	0.00	0.00	623	0.0000	0.0000
CLN3(1201)	KPRP_HUMAN	448834	KPRP	13	13	13	1	0.00	0.00	14	0.0000	0.0000
CLN3(1201)	K2C5_HUMAN	3852	KRT5	239	239	239	1	0.00	0.00	251	0.0000	0.0000
CLN3(1201)	K2C6C_HUMAN	286887	KRT6C	246	246	246	1	0.00	0.00	240	0.0000	0.0000
CLN3(1201)	DESP_HUMAN	1832	DSP	25	25	25	1	0.00	0.00	20	0.0000	0.0000
CLN3(1201)	K1C16_HUMAN	3868	KRT16	51	51	51	1	0.00	0.00	31	0.0000	0.0000
CLN3(1201)	K1C14_HUMAN	3861	KRT14	59	59	59	1	0.00	0.00	41	0.0000	0.0000
CLN3(1201)	K2C6A_HUMAN	3853	KRT6A	241	241	241	1	0.00	0.00	239	0.0000	0.0000
CLN3(1201)	IGHG1_HUMAN	3500	IGHG1	58	58	58	1	0.00	0.00	67	0.0000	0.0000
CLN3(1201)	K1C17_HUMAN	3872	KRT17	20	20	20	1	0.00	0.00	14	0.0000	0.0000
CLN3(1201)	PLAK_HUMAN	3728	JUP	17	17	17	1	0.00	0.00	11	0.0000	0.0000
CLN3(1201)	K1C9_HUMAN	3857	KRT9	398	398	398	1	0.00	0.00	342	0.0000	0.0000
CLN3(1201)	K2C78_HUMAN	196374	KRT78	8	8	8	1	0.00	0.00	11	0.0000	0.0000
CLN3(1201)	FILA2_HUMAN	388698	FLG2	2	2	2	1	0.00	0.00	1	0.0000	0.0000
CLN3(1201)	GCN1L_HUMAN	10985	GCN1L1	1	1	1	1	0.00	0.00	0	0.0000	0.0000
CLN3(1201)	K22E_HUMAN	3849	KRT2	553	553	553	1	0.00	0.00	536	0.0000	0.0000
CLN3(1201)	HV316_HUMAN		HV316_HUMAN	7	7	7	1	0.00	0.00	7	0.0000	0.0000
CLN3(1201)	HORN_HUMAN	388697	HRNR	23	23	23	1	0.00	0.00	22	0.0000	0.0000
CLN3(1201)	USMG5_HUMAN	84833	USMG5	1	1	1	1	0.00	0.00	0	0.0000	0.0000
CLN3(1201)	ARGI1_HUMAN	383	ARG1	2	2	2	1	0.00	0.00	2	0.0000	0.0000
CLN3(1201)	KT33B_HUMAN	3884	KRT33B	3	3	3	1	0.00	0.00	3	0.0000	0.0000
CLN3(1201)	KV105_HUMAN		KV105_HUMAN	6	6	6	1	0.00	0.00	5	0.0000	0.0000
CLN3(1201)	LAC7_HUMAN	28834	IGLC7	20	20	20	1	0.00	0.00	20	0.0000	0.0000
CLN3(1201)	ALBU_HUMAN	213	ALB	11	11	11	1	0.00	0.00	11	0.0000	0.0000
CLN3(1201)	KV305_HUMAN		KV305_HUMAN	8	8	8	1	0.00	0.00	6	0.0000	0.0000
CLN3(1201)	LAC2_HUMAN	3538	IGLC2	22	22	22	1	0.00	0.00	22	0.0000	0.0000
CLN3(1201)	K2C74_HUMAN	121391	KRT74	13	13	13	1	0.00	0.00	13	0.0000	0.0000
CLN3(1201)	K2C1_HUMAN	3848	KRT1	838	838	838	1	0.00	0.00	886	0.0000	0.0000
CLN3(1201)	G3P_HUMAN	2597	GAPDH	7	7	7	1	0.00	0.00	6	0.0000	0.0000
CLN3(1201)	DSC1_HUMAN	1823	DSC1	7	7	7	1	0.00	0.00	6	0.0000	0.0000
CLN3(1201)	HV313_HUMAN		HV313_HUMAN	3	3	3	1	0.00	0.00	3	0.0000	0.0000
Legend: SAINT analysis of protein complexes isolated from SH-SY5Y-NTAP-CLN3 stable cells subjected to TAP-MS, is shown. Human full length TAP-tagged CLN3 served as the bait. Several prey proteins associated with the CLN3 bait are indicated by Gene name (PreyGeneName) and unique Gene Identifiers (PreyGeneID from NCBI). Abbreviations: ID, identification; Spec, Spectral counts; Rep, Replicates; Prob…
